# Supplementary material
Source: publisher figshare collection journal article supplement (https://acs.figshare.com/ndownloader/files/18028445)
Supplement: Supplementary file 1 [file 18028445]

Supplementary Materials for

**Assessment of Full-Scale N<sub>2</sub>O Emission Characteristics and Testing of Control Concepts  
in an Activated Sludge Wastewater Treatment Plant with Alternating Aerobic and  
Anoxic Phases**

Xueming Chen<sup>1,\*</sup>, Artur Tomasz Mielczarek<sup>2</sup>, Kirsten Habicht<sup>3</sup>, Mikkol Holmen Andersen<sup>3</sup>,  
Dines Thornberg<sup>2</sup>, Gürkan Sin<sup>1,\*</sup>

<sup>1</sup>Process and Systems Engineering Center (PROSYS), Department of Chemical and  
Biochemical Engineering, Technical University of Denmark, 2800 Kgs. Lyngby, Denmark.

<sup>2</sup>Biofos A/S, Refshalevej 250, 1432 Copenhagen, Denmark.

<sup>3</sup>Unisense Environment A/S, Tueager 1, DK-8200 Aarhus N, Denmark.

\*Corresponding authors:

Dr. Xueming Chen, Phone: +45 8194 8080, E-mail: [xuem.chen@hotmail.com](mailto:xuem.chen@hotmail.com)

Dr. Gürkan Sin, Phone: +45 2381 1148, E-mail: [gsi@kt.dtu.dk](mailto:gsi@kt.dtu.dk)

Number of pages: 5

Number of figures: 3

### Pearson's partial correlation analysis

Partial correlation is a method used to describe the relationship between two variables (e.g.,  $\mathbf{x}$  and  $\mathbf{y}$ ) whilst removing the effect of other variables (e.g.,  $\mathbf{t}$ ). It firstly considers linear regression to predict  $\mathbf{x}$  and  $\mathbf{y}$  from  $\mathbf{t}$ , and then correlates the residuals (i.e.,  $\mathbf{x} - \hat{\mathbf{x}}$  and  $\mathbf{y} - \hat{\mathbf{y}}$ ) to quantify the strength of the relationship between  $\mathbf{x}$  and  $\mathbf{y}$  when the effect of  $\mathbf{t}$  has been excluded. The Pearson's partial correlation coefficient is calculated using the equation below.

$$r_{xy,t} = \frac{r_{xy} - r_{xt} * r_{yt}}{\sqrt{(1 - r_{xt}^2) * (1 - r_{yt}^2)}} \quad (\text{S1})$$

Where  $r_{xy,t}$  = partial correlation between  $\mathbf{x}$  and  $\mathbf{y}$  controlling for  $\mathbf{t}$

$r_{xy}$  = correlation between  $\mathbf{x}$  and  $\mathbf{y}$

$r_{xt}$  = correlation between  $\mathbf{x}$  and  $\mathbf{t}$

$r_{yt}$  = correlation between  $\mathbf{y}$  and  $\mathbf{t}$

As indicated in Eq. S1, the coefficient,  $r_{xy,t}$ , calculated through the Pearson's partial correlation which removes the effect of other variables should be different from  $r_{xy}$  calculated directly using the Pearson's correlation.

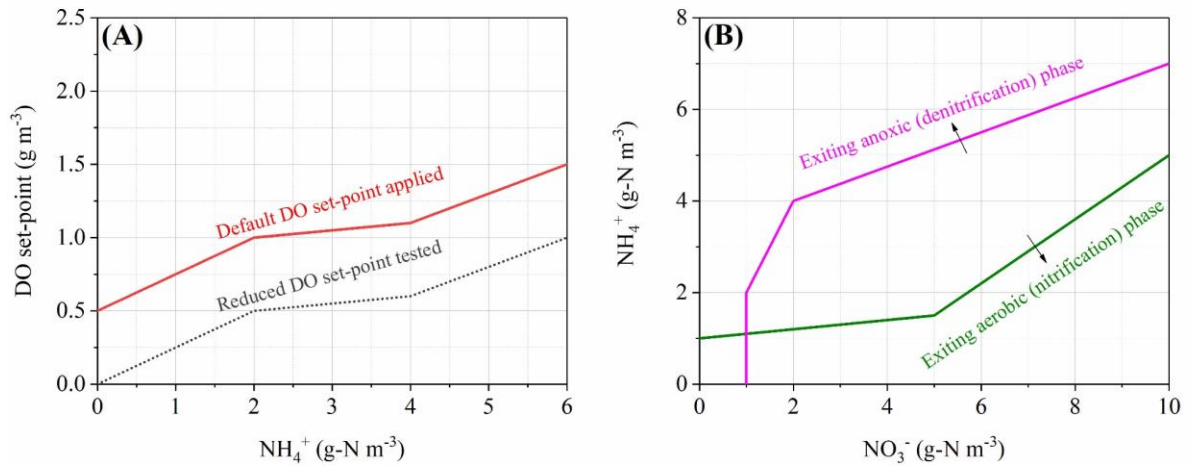

**Figure S1.** (A) Default and tested DO set-point based on NH<sub>4</sub><sup>+</sup> concentration and (B) default relationship between NH<sub>4</sub><sup>+</sup> and NO<sub>3</sub><sup>-</sup> concentrations that regulates exiting of aerobic/anoxic phase in the STAR Control<sup>®</sup>.

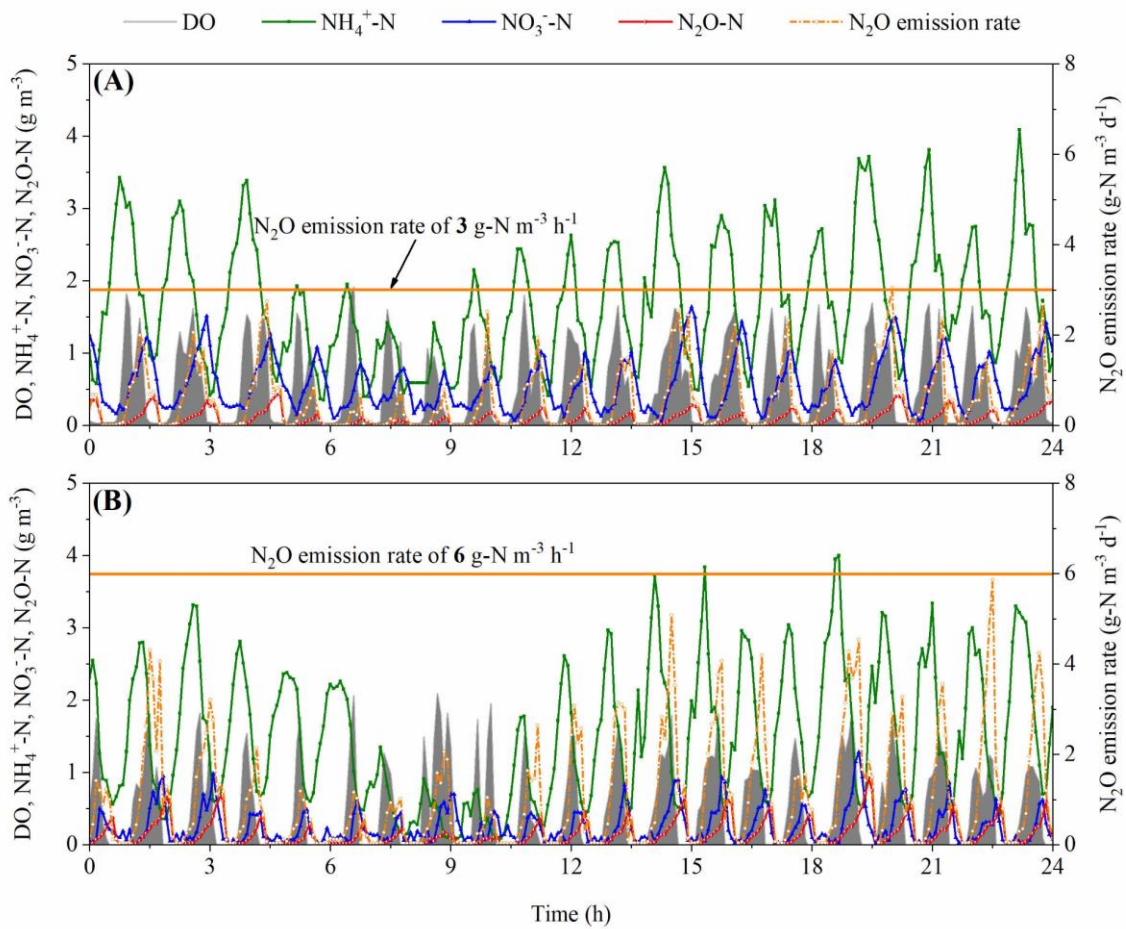

**Figure S2.** Dynamic profiles of process variables on June 26, 2018 in (A) Reactor 1 and (B) Reactor 3 with similar concentrations and behavior of  $\text{NH}_4^+$ ,  $\text{NO}_3^-$ , and DO but different ranges and responses of  $\text{N}_2\text{O}$ .

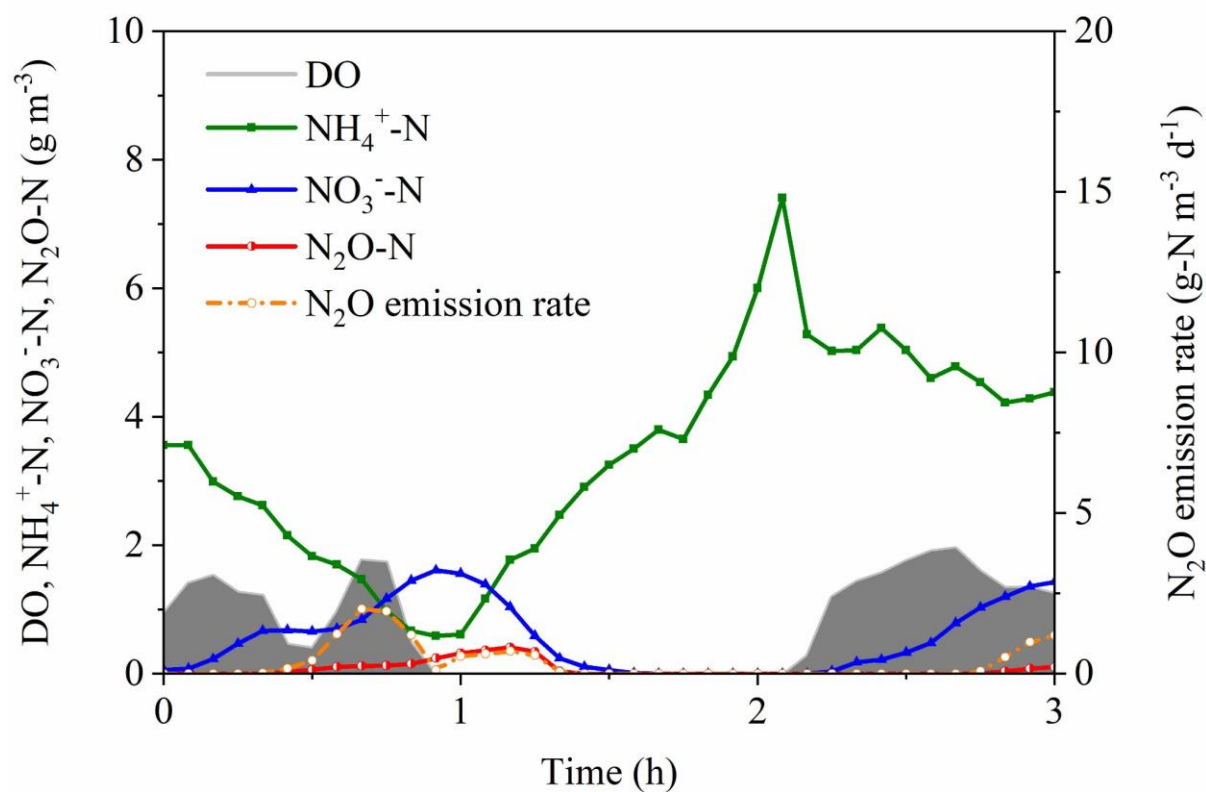

**Figure S3.** Cyclic data showing lack of nitrification activity in the anoxic phase (DO as electron acceptor for nitrification was strictly 0 and nitrate didn't reappear after depletion, while ammonium increased consistently due to influent supply).
